# Supplementary material for: Nine Genes Mediate the Therapeutic Effects of Iodine-131 Radiotherapy in Thyroid Carcinoma Patients
Source: Dis Markers. 2020 Jun 16;2020:9369341. doi: 10.1155/2020/9369341 (PMC7317313; doi:10.1155/2020/9369341)
Supplement: Supplementary 2 — Table S2: nodes—green. [file 9369341.f2.xlsx]

## Sheet: Sheet1
nodeName	nodeAttr.nodesPresent...
A2M	green
ABCB1	green
ABCC9	green
ABCG2	green
ABI3	green
ACE	green
ACVRL1	green
ADAMTS7	green
ADAMTSL2	green
ADCY4	green
ADCY5	green
ADGRA2	green
ADGRL4	green
AFAP1L1	green
AGTR1	green
AKR1E2	green
ANGPT2	green
ANO2	green
AOC2	green
AOC3	green
APLNR	green
APOL5	green
APOLD1	green
AQP1	green
AQP7	green
ARAP3	green
ARHGEF15	green
ARHGEF25	green
ASPA	green
ASPRV1	green
ATP1B2	green
ATP2A3	green
AVPR1A	green
AVPR2	green
B4GALNT1	green
BCL6B	green
BTNL9	green
BVES	green
C1QTNF2	green
C1QTNF9B	green
C20orf202	green
C3orf70	green
CA2	green
CA4	green
CABP1	green
CACNA1A	green
CACNA1C	green
CACNA1H	green
CACNG8	green
CALCRL	green
CALHM2	green
CALHM5	green
CAPN11	green
CASP12	green
CASQ2	green
CAVIN2	green
CCDC141	green
CCDC3	green
CCL14	green
CCM2L	green
CD248	green
CD34	green
CD36	green
CD93	green
CDA	green
CDH13	green
CDH5	green
CETP	green
CFAP74	green
CHRD	green
CHRM3	green
CLDN5	green
CLEC14A	green
CLEC1A	green
CLEC3B	green
CLMN	green
CNRIP1	green
COL15A1	green
COL18A1	green
COL25A1	green
COL4A1	green
COL4A2	green
COL5A3	green
COL9A1	green
COLEC11	green
CORO2B	green
COX4I2	green
CPLX1	green
CPNE2	green
CSMD2	green
CSPG4	green
CYGB	green
CYP26B1	green
CYP4X1	green
CYSLTR1	green
CYYR1	green
DAAM2	green
DACT3	green
DCLK2	green
DCLK3	green
DENND2A	green
DGKB	green
DLL1	green
DLL4	green
DNAI2	green
DNASE1L3	green
DOC2B	green
DOK6	green
DPF3	green
DUOX2	green
DUOXA2	green
DYNC1I1	green
DYSF	green
EBF1	green
EBF2	green
EBF3	green
ECM2	green
ECSCR	green
EDIL3	green
EDNRB	green
EEPD1	green
EFCC1	green
EGFL7	green
EGFLAM	green
ELFN1	green
ELMO1	green
ELN	green
ELOVL2	green
EMCN	green
ENG	green
ENPEP	green
EPAS1	green
EPHA3	green
ERG	green
ESAM	green
EXOC3L1	green
F2RL3	green
FAM110D	green
FAM124B	green
FAM162B	green
FAM167B	green
FAM198B	green
FAM241A	green
FBXO17	green
FEZ1	green
FGD5	green
FGF12	green
FHL5	green
FILIP1	green
FILIP1L	green
FLI1	green
FLT1	green
FLT4	green
FMNL3	green
FOXC1	green
FOXF1	green
FOXS1	green
FRZB	green
FSCN1	green
FZD4	green
FZD9	green
GABRD	green
GABRG1	green
GATA2	green
GDF7	green
GFOD1	green
GIMAP1	green
GIMAP4	green
GIMAP5	green
GIMAP6	green
GIMAP7	green
GIMAP8	green
GIPC2	green
GIPC3	green
GJA5	green
GJC1	green
GNG11	green
GNG2	green
GPIHBP1	green
GPR17	green
GPR176	green
GPR4	green
GRASP	green
GRB10	green
GYPC	green
HECW2	green
HEY1	green
HEYL	green
HIC1	green
HIGD1B	green
HLX	green
HRC	green
HSD11B2	green
HSPA12B	green
HTR1F	green
HTRA1	green
HYAL1	green
INKA1	green
ITGA1	green
ITGA10	green
ITGA5	green
ITGA8	green
ITM2A	green
JAG2	green
JAM2	green
JAM3	green
KCNB1	green
KCNC4	green
KCNE3	green
KCNE4	green
KCNJ8	green
KCNN2	green
KCNN3	green
KDR	green
KIF26A	green
KITLG	green
KLF2	green
LAMA4	green
LAMB4	green
LAYN	green
LDB2	green
LDB3	green
LDLRAD2	green
LGI4	green
LHFPL6	green
LHX6	green
LIMS2	green
LIPG	green
LIX1L	green
LMO2	green
LMOD1	green
LOXL2	green
LRRC17	green
LRRC32	green
LRRC4	green
LRRC4B	green
LRRC70	green
LRRC8C	green
LYL1	green
MAPK11	green
MAPK12	green
2020-03-03	green
MCAM	green
MCF2L	green
MEF2C	green
MEOX2	green
MFNG	green
MLKL	green
MMRN2	green
MPPED2	green
MRVI1	green
MSI1	green
MSRB3	green
MSX1	green
MTSS1	green
MUC3A	green
MYCT1	green
MYH11	green
MYLK	green
MYO7B	green
MYOM1	green
NCALD	green
NDUFA4L2	green
NES	green
NEURL1B	green
NEXN	green
NFASC	green
NOS3	green
NOSTRIN	green
NOTCH3	green
NOTCH4	green
NOVA2	green
NPR1	green
NPY5R	green
NRARP	green
NRIP2	green
NRN1	green
OTOGL	green
P2RY1	green
P2RY14	green
P2RY8	green
P3H2	green
PALMD	green
PAMR1	green
PARVB	green
PCDH12	green
PCDH17	green
PDE1B	green
PDE2A	green
PDE3A	green
PDE7B	green
PDE8B	green
PDGFB	green
PDGFD	green
PDGFRB	green
PDZD4	green
PEAR1	green
PECAM1	green
PGM5	green
PIEZO2	green
PIK3R3	green
PLAC9	green
PLCL1	green
PLCL2	green
PLN	green
PLPP1	green
PLPP7	green
PLVAP	green
PLXNB3	green
PODXL	green
POPDC2	green
PPARGC1B	green
PPM1F	green
PPP1R14A	green
PRKG1	green
PRR16	green
PRRG3	green
PTPRB	green
PYGM	green
PZP	green
QRFPR	green
RAMP2	green
RAMP3	green
RAPGEF4	green
RASGRF2	green
RASGRP3	green
RASIP1	green
RASL11A	green
RASL12	green
RCAN2	green
REEP1	green
REM1	green
RERG	green
RFLNB	green
RFTN2	green
RFX8	green
RGCC	green
RGS5	green
RHOBTB1	green
RHOJ	green
RIPOR3	green
RNASE1	green
RNF152	green
ROBO4	green
RTN4RL1	green
RUNDC3B	green
RUNX1T1	green
SAMD14	green
SCARF1	green
SCN4B	green
SELE	green
SEMA3G	green
SEMA6A	green
SEMA6B	green
SEPT4	green
SGK1	green
SH2D3C	green
SH3RF3	green
SH3TC1	green
SHANK3	green
SLC10A4	green
SLC26A7	green
SLC38A11	green
SLC5A4	green
SLC6A1	green
SLC9A3R2	green
SLC9A9	green
SLCO1C1	green
SLCO2A1	green
SMIM10	green
SMTN	green
SOCS2	green
SOX17	green
SOX18	green
SOX7	green
SPAAR	green
SPARCL1	green
SPNS2	green
SPRY4	green
ST3GAL2	green
STAB1	green
STARD8	green
STC2	green
SYDE1	green
SYN3	green
SYNM	green
SYT15	green
TAL1	green
TBX15	green
TBX2	green
TBXA2R	green
TCF4	green
TCF7L1	green
TEK	green
TFPI	green
THBD	green
THSD1	green
THSD7B	green
THY1	green
TIE1	green
TM4SF18	green
TMC7	green
TMEM150C	green
TMEM204	green
TMEM255B	green
TMEM47	green
TMEM88	green
TNFAIP8L1	green
TNN	green
TP53I11	green
TPM2	green
TPPP3	green
TRPC4	green
TRPC6	green
TSPAN18	green
TSPAN7	green
USHBP1	green
VASH1	green
VIP	green
VIPR1	green
VWA1	green
VWF	green
WSCD2	green
ZEB1	green
ZEB2	green
ZNF423	green
ZNF467	green
ZNF521	green
